# Supplementary material
Source: publisher figshare collection journal article supplement (https://springernature.figshare.com/ndownloader/files/13345784)
Supplement: Supplementary file [file 13345784]

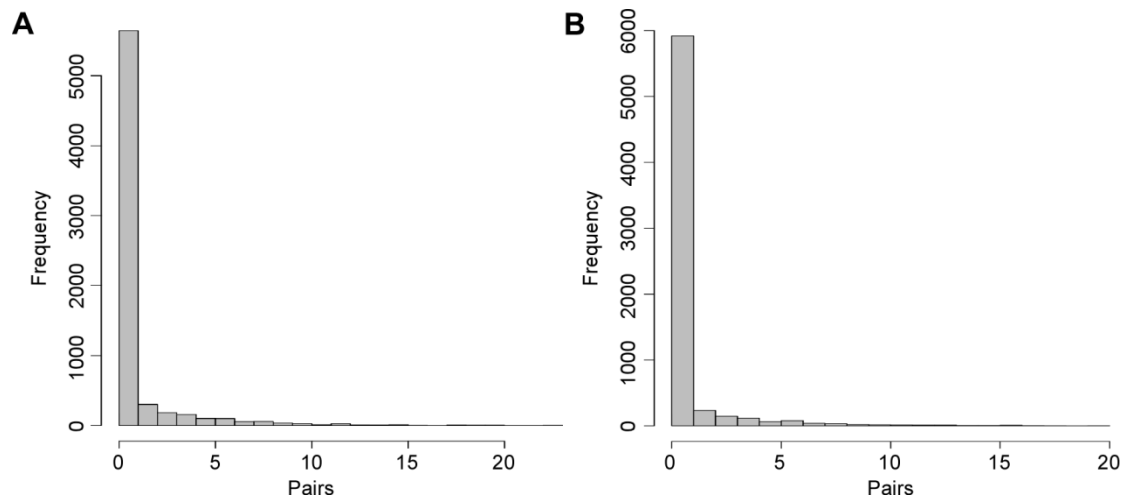

**Additional file 2:** The frequency distribution of the genes with lengthened 3'UTR (A) and shortened 3'UTR (B) in different pairs, comparing NPC and NNET.
